# Supplementary material for: Discovering functional sequences with RELICS, an analysis method for CRISPR screens
Source: PLoS Comput Biol. 2020 Sep 16;16(9):e1008194. doi: 10.1371/journal.pcbi.1008194 (PMC7521704; doi:10.1371/journal.pcbi.1008194)
Supplement: S2 Table — FSs, and ‘Neg. Target’ sgRNAs correspond to labels in Fig 4D. NTC is a non-targeting control sgRNA. (XLSX) [file pcbi.1008194.s011.xlsx]

## Sheet: Sheet1
Target gene	region	gRNA	hg19 coordinate (chr12)
CD69_tss_sg1	TSS	CAATGTATAGTGTGTTGTTG	9913617-9913636
CD69_tss_sg2	TSS	TCAAGCAAGTAGGCGGCAAG	9913557 -9913576
CD69_FS1_sg2	FS1	AGGTAACCATGAGTAAACGG	9917833-9917852
CD69_TNC_sg1	‘Neg. Target’	CCATTTCCCTCCACAAGCCC	9919830-9919849
CD69_FS4_sg1	FS4	GCATAGAATTGATATCACCA	9925936-9925955
CD69_FS4_sg2	FS4	GGATTCGTCTTCTGAGTTAC	9925975-9925994
CD69_FS3_sg1	FS3	TATTCCTGCTGTATAACAGA	9950460-9950479
CD69_FS3_sg2	FS3	GTTAAATAATAGAGGGCACA	9950613-9950632
NTC		CTGAAAAAGGAAGGAGTTGA
