# Supplementary material for: Discovering functional sequences with RELICS, an analysis method for CRISPR screens
Source: PLoS Comput Biol. 2020 Sep 16;16(9):e1008194. doi: 10.1371/journal.pcbi.1008194 (PMC7521704; doi:10.1371/journal.pcbi.1008194)
Supplement: S5 Table — (DOCX) [file pcbi.1008194.s014.docx]

| **Variable** | **Description** |
| --- | --- |
|  | Number of pools in screen |
|  | Number of functional sequences |
|  | Maximum length of functional sequence in genome segments |
|  | Number of genome segments |
|  | Number of sgRNAs |
|  | Observed sgRNA counts (matrix of dimension ) |
|  | Functional sequence configuration (matrix of dimension ). Each row, specifies the placement (length and position) of functional sequence . A specific placement is denoted , where is the genome segment containing the start of the functional sequence and is the length of the functional sequence. |
|  | Probability a genome segment contains a specific functional sequence (matrix of dimension ) |
|  | Hyperparameters for sorting probability distribution (vector of length ) |
|  | sgRNA sorting probabilities (vector of length ) |
|  | Number of genome segments that an sgRNA overlaps that contain a functional sequence (vector of length ) |
|  | Probability genome segments contains any functional sequence (vector of length ) |
|  | Length of a functional sequence |
|  | Mapping of sgRNAs to genome segments |
